# Supplementary material for: A Novel Immunoassay for Malondialdehyde-Conjugated Low-Density Lipoprotein Measures Dynamic Changes in the Blood of Patients Undergoing Coronary Artery Bypass Graft Surgery
Source: MDPI journal article supplement (doi:10.3390/antiox10081298), 2021-08-17
Supplement: s1 [file s1]

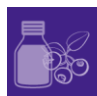

# Supplementary Materials: A Novel Immunoassay for Malondialdehyde-Conjugated Low-Density Lipoprotein Measures Dynamic Changes in the Blood of Patients Undergoing Coronary Artery Bypass Graft Surgery

Samata S. Pandey <sup>1,†</sup>, Adam Hartley <sup>1,†</sup>, Mikhail Caga-Anan <sup>1</sup>, Tareq Ammari <sup>1</sup>, Ameer Hamid Ahmed Khan <sup>1</sup>, Bao Anh Vu Nguyen <sup>1</sup>, Chiari Kojima <sup>1</sup>, Jon Anderson <sup>2</sup>, Steven Lynham <sup>3</sup>, Michael Johns <sup>1</sup>, Dorian O. Haskard <sup>1</sup> and Ramzi Y. Khamis <sup>1,\*</sup>

<sup>1</sup> Vascular Sciences Section, National Heart and Lung Institute, Imperial Centre for Translational and Experimental Medicine, Imperial College London, London W12 0NN, UK; samata.pandey12@imperial.ac.uk (S.P.); adam.hartley12@imperial.ac.uk (A.H.); m-caga.anan@imperial.ac.uk (M.C.-A.); Tareq.ammari@gmail.com (T.A.); ameerhamidahmedkhan@gmail.com (A.H.A.K.); bao.nguyen@doctors.net.uk (B.A.V.N.); c.kojima@imperial.ac.uk (C.K.); m.johns@imperial.ac.uk (M.J.); d.haskard@imperial.ac.uk (D.O.H.)

<sup>2</sup> Department of Cardiothoracic Surgery, Hammersmith Hospital, Imperial College Healthcare NHS Trust, London, W12 0HS, UK; jonr.anderson@nhs.net

<sup>3</sup> Centre of Excellence for Mass Spectrometry, Proteomics Facility, Denmark Hill Campus, Kings College London, London, SE5 9NU, UK; steven.lynham@kcl.ac.uk

† Equally contributed: samata.pandey12@imperial.ac.uk (S.P.); adam.hartley12@imperial.ac.uk (A.H.)

\* Corresponding author: ramzi.khamis@imperial.ac.uk; Tel.: +44-(020)-7594-6842

**Citation:** Pandey, S.S.; Hartley, A.; Caga-Anan, M.; Ammari, T.; Khan, A.H.A.; Nguyen, B.A.V.; Kojima, C.; Anderson, J.; Lynham, S.; Johns, M.; et al. A Novel Immunoassay for Malondialdehyde-Conjugated Low-Density Lipoprotein Measures Dynamic Changes in the Blood of Patients Undergoing Coronary Artery Bypass Graft Surgery. *Antioxidants* **2021**, *10*, 1298. <https://doi.org/10.3390/antiox10081298>

Academic Editor: Fumiaki Ito

Received: 29 June 2021

Accepted: 10 August 2021

Published: 17 August 2021

**Publisher's Note:** MDPI stays neutral with regard to jurisdictional claims in published maps and institutional affiliations.

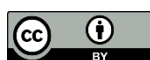

**Copyright:** © 2021 by the authors. Licensee MDPI, Basel, Switzerland. This article is an open access article distributed under the terms and conditions of the Creative Commons Attribution (CC BY) license (<http://creativecommons.org/licenses/by/4.0/>).

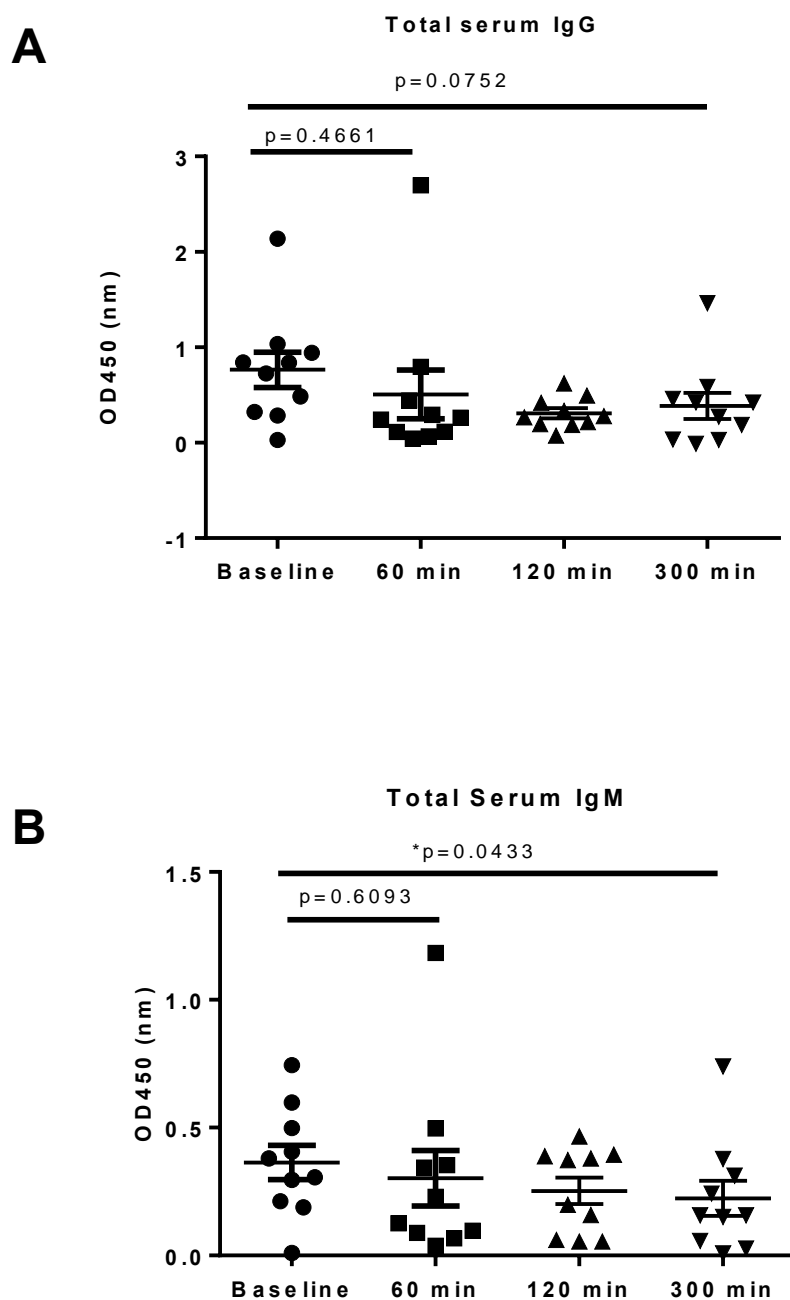

**Figure S1.** Changes in total serum IgG and IgM post CABG surgery (n=10). A) Total IgG did not change from baseline to 300 minutes B) IgM decreased from baseline to 300 minutes. Values are mean  $\pm$  SEM.

**Table S1.** Inclusion and exclusion criteria for the patients undergoing coronary artery bypass grafting in the population study. CABG, coronary artery bypass grafting.

|                    |                                                                                                                                                |
|--------------------|------------------------------------------------------------------------------------------------------------------------------------------------|
| Inclusion Criteria | Patients referred for primary elective CABG surgery at Hammersmith Hospital were considered for inclusion                                      |
| Exclusion Criteria | -Paediatric patients<br>-Emergency surgeries (within 24 hours)<br>-Combined CABG and valve replacement<br>-Re-do operations with re-sternotomy |

- Poor left ventricular function (ejection fraction <30% on echocardiogram)
- Recent cerebrovascular accident within 3 months pre-operatively/>75% carotid artery obstruction on ultrasound
- Pre-existing renal impairment (serum creatinine>177µmol/L)
  - Pre-existing coagulopathy
  - Pre-existing liver dysfunction
- Recent (within 5 days) use of antiplatelet agents (aspirin, clopidogrel)

**Table S2.** The top 10 protein identifications from each patient using LC-MS/MS. ApoB-100 peptides were detected in all three patients at seven-fold higher levels than the next most abundant protein. Unless stated otherwise, origin of protein was identified as Homo sapiens.

| Patient 1                           |               | Patient 2                     |               | Patient 3                           |               |
|-------------------------------------|---------------|-------------------------------|---------------|-------------------------------------|---------------|
| <i>Proteins identified</i>          | <i>Counts</i> | <i>Proteins identified</i>    | <i>Counts</i> | <i>Proteins identified</i>          | <i>Counts</i> |
| Apolipoprotein B-100                | 363           | Apolipoprotein B-100          | 429           | Apolipoprotein B-100                | 354           |
| Cationic trypsin (Bos taurus)       | 14            | Apolipoprotein(a)             | 47            | Cationic trypsin (Bos taurus)       | 13            |
| Apolipoprotein(a)                   | 7             | Fibrinogen alpha chain        | 32            | Apolipoprotein(a)                   | 5             |
| Complement C4-A                     | 4             | Fibronectin                   | 29            | Serum albumin (Bos taurus)          | 5             |
| Ig mu chain C region                | 3             | Fibrinogen beta chain         | 22            | Ig lambda-6 chain C region          | 2             |
| Serum albumin (Bos taurus)          | 2             | Fibrinogen gamma chain        | 21            | Fibrinogen alpha chain              | 1             |
| Ig lambda-6 chain C region          | 2             | von Willebrand factor         | 13            | Complement C4-A                     | 1             |
| Anionic trypsin (Rattus norvegicus) | 1             | Serum albumin (Bos taurus)    | 11            | Anionic trypsin (Rattus norvegicus) | 1             |
| Ig gamma 4 chain C region           | 1             | Cationic trypsin (Bos taurus) | 10            | Ig gamma 4 chain C region           | 1             |
| Ig lambda chain V region            | 1             | Ig mu chain C region          | 8             | Hornerin                            | 1             |
